# Supplementary material for: Synthesis of the pyrrolo[2,3-c]carbazole core of the dictyodendrins
Source: Royal Society of Chemistry journal article supplement (doi:10.1039/b822933n), 2009-01-01
Supplement: b822933n.pdf [file b822933n.pdf]

*Electronic Supporting Information*

## **Synthesis of the Pyrrolo[2,3-*c*]carbazole Core Containing in Dictyodendrins Skeleton**

Carles Ayats,<sup>\*a</sup> Roger Soley,<sup>a</sup> Fernando Albericio<sup>a,b</sup> and Mercedes Álvarez<sup>\*a,c</sup>

<sup>a</sup>*Institute for Research in Biomedicine, Barcelona Scientific Park-University of Barcelona, Baldri Reixach 10-12, E-08028 Barcelona, Spain.*

<sup>b</sup>*Department of Organic Chemistry, University of Barcelona, E-08028 Barcelona, Spain.*

<sup>c</sup>*Laboratory of Organic Chemistry, Faculty of Pharmacy, University of Barcelona, E-08028 Barcelona, Spain.*

*mercedes.alvarez@irbbarcelona.org*

### **Table of Contents**

|                         |             |
|-------------------------|-------------|
| General Remarks         | <b>2</b>    |
| Experimental procedures | <b>2-13</b> |

**General Remarks:** Melting points of crystallized compounds were determined in open capillary tubes. NMR spectra were recorded in CDCl<sub>3</sub> in the following spectrometers: <sup>1</sup>H NMR (400 MHz), <sup>13</sup>C NMR (100.5 MHz). Chemical shifts (δ) are reported in ppm related to internal tetramethylsilane (TMS). Assignments given for the NMR spectra are based on DEPT, COSY <sup>1</sup>H/<sup>1</sup>H, HETCOR <sup>1</sup>H/<sup>13</sup>C (HSQC and HMBC sequences for one bond and long range <sup>1</sup>H/<sup>13</sup>C heterocorrelations, respectively) and NOESY experiments for selected compounds. For HPLC analysis a C18 column [4.6 × 150 mm, 5 μm, CH<sub>3</sub>CN/H<sub>2</sub>O 60:40 till CH<sub>3</sub>CN/H<sub>2</sub>O 90:10 (15 min), then CH<sub>3</sub>CN 100% (1 min), flow of 1 ml/min] was used. For semipreparative HPLC analysis a C18 column [7.8 × 100 mm, 5 μm, CH<sub>3</sub>CN/H<sub>2</sub>O 60:40 isocratic, flow of 3 ml/min] was used. For the routine MS were obtained using ESI (+) techniques. Only significant ions are given: those with higher relative abundance, except for the ions with higher *m/z* values. Accurate mass measurements were obtained using ESI (+) or CI techniques. Absorption values in the IR spectra are given as wave-numbers (cm<sup>-1</sup>). Column chromatography was performed on silica gel 60 Å (35-70 mesh). Thin layer chromatography (TLC) was performed with aluminium-backed sheets with silica gel 60 F<sub>254</sub> and spots were visualized with UV light.

### 1-(Triisopropylsilyl)-3-(4-methoxyphenyl)pyrrole, **6**

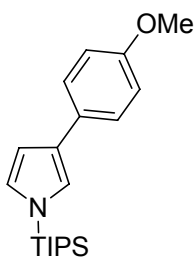

**6**

A solution of *n*-BuLi (2.5 M in hexane, 8.0 mL, 19.84 mmol) was added dropwise to a solution of **4** (3.0 g, 9.92 mmol) in dry THF (50 mL) at cooled -78 °C. The reaction mixture was stirred for 25 min at -78 °C and then a solution of 2-methoxy-4,4,5,5-tetramethyl-1,3,2-dioxaborolane (10.2 mL, 59.52 mmol) in dry THF (200 mL) was added. The mixture was stirred at -78 °C for 1 h, allowed to warm to room temperature and then quenched with saturated aqueous NH<sub>4</sub>Cl solution (60 mL). The

aqueous solution was extracted with diethyl ether (3 × 120 mL) and the combined organic phases were dried (anhydrous Na<sub>2</sub>SO<sub>4</sub>) and concentrated at reduced pressure to give a colorless oil (10.23 g). Pd(PPh<sub>3</sub>)<sub>4</sub> (1.15 g, 0.99 mmol) was added to a stirred mixture of the above colorless oil (10.23 g), 4-bromoanisole (2.5 mL, 19.84 mmol) in toluene (200 mL), aqueous Na<sub>2</sub>CO<sub>3</sub> solution (2 M, 10 mL, 19.84 mmol) and MeOH (40 mL) under an argon atmosphere and the mixture was heated at reflux temperature for 16 h. After cooling, the solvent was evaporated under reduced pressure and the aqueous layer was extracted with AcOEt (3 × 300 mL). The combined organic layers were dried over anhydrous Na<sub>2</sub>SO<sub>4</sub>, filtered, and concentrated at reduced pressure to give an orange oil (10.54 g) which was submitted to flash silica gel column chromatography (hexane / AcOEt 95:5) to give pure **6** (2.66 g, 81% yield) as a yellow oil. Compound **6** was characterized by comparing their <sup>1</sup>H-RMN spectra to the previously reported data described in the literature.<sup>1</sup>

<sup>1</sup> A. Álvarez, A. Guzmán, A. Ruiz, and E. Velarde, *J. Org. Chem.*, 1992, **57**, 1653.

### 3-Bromo-4-(4-methoxyphenyl)-1H-pyrrole, 7

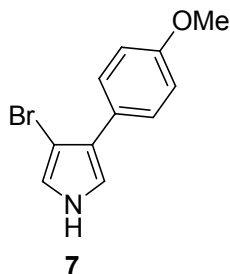

NBS (110 mg, 0.61 mmol) was added to a stirred solution of **6** (200 mg, 0.61 mmol) in dry THF (2 mL) at cooled  $-78^{\circ}\text{C}$ . The reaction mixture was kept at  $-78^{\circ}\text{C}$  for 2 h and then left to reach room temperature for 2 h.  $\text{CH}_2\text{Cl}_2$  (20 mL) was added, the resulting suspension was filtered through a plug of neutral alumina and the filtrate was evaporated under reduced pressure to give a brown oil (248 mg).

A solution of TBAF in THF (1.0 M, 0.65 mL, 0.65 mmol) was added to a stirred solution of the above brown oil (248 mg) in THF (3 mL). After stirring at room temperature for 45 min, water (20 mL) was added. The resulting solution was extracted with AcOEt ( $3 \times 20$  mL). The combined organic layers were dried over anhydrous  $\text{Na}_2\text{SO}_4$ , filtered, and concentrated at reduced pressure to give a black oil (256 mg) which was submitted to flash silica gel column chromatography (hexane / AcOEt 80:20) to give pure **7** (80.3 mg, 52% yield) as a brown oil. Compound **7** was characterized by comparing their  $^1\text{H}$ -RMN spectra to the previously reported data described in the literature.<sup>2</sup>

### 3-Bromo-1-(4-methoxyphenethyl)-4-(4-methoxyphenyl)-1H-pyrrole, 9

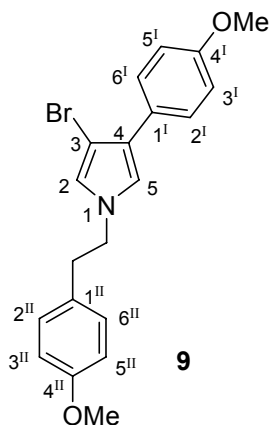

$\text{K}_2\text{CO}_3$  (120 mg, 0.88 mmol) was added to a stirred solution of **7** (40.6 mg, 0.16 mmol) in dry DMF (1.5 mL) at room temperature and the reaction mixture was maintained for 30 min at the same temperature. After this time, 4-methoxyphenethyl bromide (140  $\mu\text{L}$ , 0.88 mmol) was added and the reaction mixture was heated at  $80^{\circ}\text{C}$  for 17 h. The solvent was evaporated under reduced pressure to give a yellow solid (453 mg) which was submitted to flash silica gel column chromatography (hexane / AcOEt 95:5) to give pure **9** (55.4 mg, 90% yield) as a yellow oil; IR (NaCl)  $\nu$  2925, 1610, 1512, 1245, 1178, 1030, 835, 789  $\text{cm}^{-1}$ ;  $^1\text{H}$  NMR  $\delta$ : 3.00 (t, 2 H,  $J = 7.2$  Hz,  $\text{CH}_2\text{-Ar}$ ),

3.80 (s, 3 H,  $4^{\text{II}}\text{OCH}_3$ ), 3.83 (s, 3 H,  $4^{\text{I}}\text{OCH}_3$ ), 4.02 (t, 2 H,  $J = 7.2$  Hz,  $\text{CH}_2\text{-N}$ ), 6.59 (d, 1 H,  $J = 2.8$  Hz, H5), 6.66 (d, 1 H,  $J = 2.8$  Hz, H2), 6.85 (d, 2 H,  $J = 8.8$  Hz, H3<sup>II</sup> and 5<sup>II</sup>), 6.93 (d, 2 H,  $J = 8.8$  Hz, H3<sup>I</sup> and 5<sup>I</sup>), 7.02 (d, 2 H,  $J = 8.8$  Hz, H2<sup>II</sup> and 6<sup>II</sup>), 7.46 (d, 2 H,  $J = 8.8$  Hz, H2<sup>I</sup> and 6<sup>I</sup>).  $^{13}\text{C}$  NMR  $\delta$ : 37.2 (t,  $\text{CH}_2\text{-Ar}$ ), 52.0 (t,  $\text{CH}_2\text{-N}$ ), 55.2 (2q,  $\text{OCH}_3$ ), 94.7 (s, C3), 113.7 (d, C3<sup>I</sup> and 5<sup>I</sup>), 114.0 (d, C3<sup>II</sup> and 5<sup>II</sup>), 118.6 (d, C5), 121.1 (d, C2), 123.4 (s, C4), 126.9 (s, C1<sup>I</sup>), 128.9 (d, C2<sup>I</sup> and 6<sup>I</sup>), 129.6 (d, C2<sup>II</sup> and 6<sup>II</sup>), 129.9 (s, C1<sup>II</sup>), 158.2 (s, C4<sup>I</sup>), 158.4 (s, C4<sup>II</sup>); MS (ESI+),  $m/z$  (%): 388 (33) and 386 (32) ( $[\text{M}+\text{H}]^+$ ), 324

<sup>2</sup> L. B. Snyder, Z. Meng, R. Mate, S. V. D'Andrea, A. Marinier, C. A. Quesnelle, P. Gill, K. L. DenBleyker, J. C. Fung-Tomc, M. Frosco, A. Martel, J. F. Barrett and J. J. Bronson, *Bioorg. Med. Chem. Lett.*, 2004, **14**, 4735.

(94), 308 ( $[M-Br+2H]^+$ , 34), 282 (100). HRMS (ESI+) calcd for  $[C_{20}H_{20}BrNO_2+H]^+$ : 386.0750. Found: 386.0748.

**3-Iodo-1-(4-methoxyphenethyl)-4-(4-methoxyphenyl)-1H-pyrrole, 10**

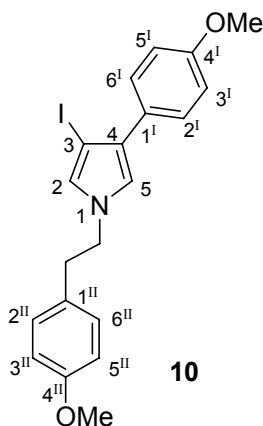

A solution of iode (460 mg, 1.82 mmol) in dry  $CH_2Cl_2$  (80 mL) was added dropwise to a stirred solution of **6** (0.60 mg, 1.82 mmol) in dry  $CH_2Cl_2$  (40 mL) containing  $Hg(OAc)_2$  (610 mg, 1.91 mmol) cooled at  $-78^\circ C$ . The reaction mixture was stirred at  $-78^\circ C$  for 1 h and then the solvent was evaporated under reduced pressure. Hexane (100 mL) was added to the residue, the mixture was filtered through a Celite® pad and the filtrate was evaporated under reduced pressure to give the iodide (860 mg) as an orange oil. A solution of TBAF in THF (1.0 M, 1.9 mL, 1.9 mmol) was added to a stirred solution of the above orange oil (860 mg) in THF (8 mL). After stirring at room temperature for 30 min, water (30 mL) was added. The resulting solution was extracted with AcOEt ( $3 \times 50$  mL). The combined organic layers were dried over anhydrous  $Na_2SO_4$ , filtered and concentrated at reduced pressure to give **8** as a brown oil.  $K_2CO_3$  (1.38 g, 10.01 mmol) was added to a stirred solution of the above brown oil in dry DMF (16 mL) at room temperature and the reaction mixture was maintained for 30 min at the same temperature. After this time, 4-methoxyphenetyl bromide (1.6 mL, 10.01 mmol) was added and the reaction mixture was heated at  $80^\circ C$  for 17 h. The solvent was removed in vacuum to give an orange solid (5.71 g) which was submitted to flash silica gel column chromatography (hexane / AcOEt 95:5) to give pure **10** (388 mg, 49% overall yield) as a yellow oil; IR (NaCl)  $\nu$  2931, 2834, 1611, 1512, 1247, 1179, 1034,  $832\text{ cm}^{-1}$ ;  $^1H$  NMR  $\delta$ : 3.00 (t, 2 H,  $J = 7.2$  Hz,  $CH_2$ -Ar), 3.80 (s, 3 H,  $C4''$ -OCH<sub>3</sub>), 3.83 (s, 3 H,  $C4'$ -OCH<sub>3</sub>), 4.04 (t, 2 H,  $J = 7.2$  Hz,  $CH_2$ -N), 6.57 (d, 1 H,  $J = 2.2$  Hz, H5), 6.73 (d, 1 H,  $J = 2.2$  Hz, H2), 6.84 (d, 2 H,  $J = 8.8$  Hz, H3'' and 5''), 6.92 (d, 2 H,  $J = 8.8$  Hz, H3' and 5'), 7.02 (d, 2 H,  $J = 8.8$  Hz, H2'' and 6''), 7.41 (d, 2 H,  $J = 8.8$  Hz, H2' and 6').  $^{13}C$  NMR  $\delta$ : 37.3 (t,  $CH_2$ -Ar), 51.9 (t,  $CH_2$ -N), 55.2 and 55.3 (2q, OCH<sub>3</sub>), 61.3 (s, C3), 113.6 (d, C3' and 5'), 114.0 (d, C3'' and 5''), 119.1 (d, C5), 126.4 (d, C2), 126.8 (s, C4), 127.9 (s, C1'), 129.3 (d, C2' and 6'), 129.6 (d, C2'' and 6''), 129.9 (s, C1''), 158.3 (s, C4'), 158.5 (s, C4''); MS (ESI+),  $m/z$  (%): 434 ( $[M+H]^+$ , 47), 307 ( $[M-I+H]^+$ , 27), 282 (21), 149 (10), 135 (100). HRMS (ESI+) calcd for  $[C_{20}H_{20}INO_2+H]^+$ : 434.0611. Found: 434.0609.

**(Z)-2-[1-Methoxy-2-(4-methoxyphenyl)vinyl]-N-tosyl-1H-indole, (Z)-13**

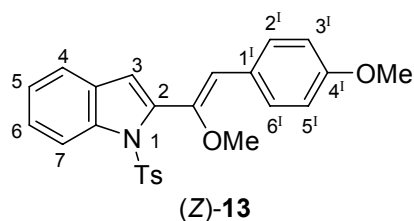

A solution of **12** (501 mg, 1.19 mmol) in dry DMF (4 mL) was added to a suspension of NaH (190 mg, 4.76 mmol) in dry DMF (6 mL) cooled at  $0^\circ C$ . The reaction mixture was allowed to warm to room temperature and was stirred for 10 min. Dimethyl sulphate (0.34 mL, 3.57 mmol) was then added and stirring continued for another 10 min. After

completion of the reaction, water (25 mL) was added and the aqueous layer was extracted with diethyl ether (3 × 50 mL). The combined organic layers were dried over anhydrous Na<sub>2</sub>SO<sub>4</sub>, filtered and concentrated at reduced pressure to give an orange oil (652 mg) which was submitted to flash silica gel column chromatography (hexane / AcOEt 95:5) to give pure (*Z*)-**13** (403 mg, 78% yield) as a white solid. mp (hexane / AcOEt) 134–136 °C; IR (KBr) ν 2932, 1640, 1571, 1508, 1248, 1175, 750, 656 cm<sup>-1</sup>; <sup>1</sup>H NMR δ: 2.31 (s, 3 H, CH<sub>3</sub> Ts), 3.62 (s, 3 H, OCH<sub>3</sub> enol), 3.84 (s, 3 H, OCH<sub>3</sub>), 5.51 (s, 1 H, CH-Ar), 6.70 (s, 1 H, H<sub>3</sub>), 6.91 (d, *J* = 8.8 Hz, 2 H, H<sub>3</sub><sup>1</sup> and 5<sup>1</sup>), 7.10 (d, *J* = 8.3 Hz, 2 H, Ts), 7.27 (ddd, *J* = 8.3, 7.3 and 1.2 Hz, 1 H, H<sub>5</sub>), 7.39 (ddd, 1 H, *J* = 8.3, 7.3 and 1.2 Hz, H<sub>6</sub>), 7.49 (br d, *J* = 8.3 Hz, 1 H, H<sub>4</sub>), 7.65 (d, *J* = 8.8 Hz, 2 H, H<sub>2</sub><sup>1</sup> and 6<sup>1</sup>), 7.67 (d, *J* = 8.3 Hz, 2 H, Ts), 8.29 (br d, *J* = 8.3 Hz, 1 H, H<sub>7</sub>). <sup>13</sup>C NMR δ: 21.5 (q, CH<sub>3</sub> Ts), 55.3 (q, OCH<sub>3</sub>), 56.9 (q, OCH<sub>3</sub> enol), 112.7 (d, CH-Ar), 113.7 (d, C<sub>3</sub><sup>1</sup> and 5<sup>1</sup>), 115.0 (d, C<sub>3</sub>), 115.7 (d, C<sub>7</sub>), 121.2 (d, C<sub>4</sub>), 124.0 (d, C<sub>5</sub>), 125.5 (d, C<sub>6</sub>), 127.2 (d, Ts), 128.5 (s), 129.3 (d, Ts), 129.5 (s), 130.0 (d, C<sub>2</sub><sup>1</sup> and 6<sup>1</sup>), 135.2 (s), 136.0 (s), 137.5 (s), 144.8 (s), 146.1 (s), 158.3 (s); MS (ESI+), *m/z* (%): 889 ([2M+Na]<sup>+</sup>, 76), 886 (22), 885 (53), 884 ([2M+NH<sub>4</sub>]<sup>+</sup>, 100), 451 ([M+NH<sub>4</sub>]<sup>+</sup>, 46), 435 (24), 434 ([M+H]<sup>+</sup>, 93), 402 ([M-OMe]<sup>+</sup>, 8). HRMS (ESI+) calcd for [C<sub>25</sub>H<sub>23</sub>NO<sub>4</sub>S+H]<sup>+</sup>: 434.1420. Found: 434.1430.

**(*Z*)-2-[2-Bromo-1-methoxy-2-(4-methoxyphenyl)vinyl]-*N*-tosyl-1*H*-indole, (*Z*)-**14** and (*E*)-2-[2-bromo-1-methoxy-2-(4-methoxyphenyl)vinyl]-*N*-tosyl-1*H*-indole, (*E*)-**14****

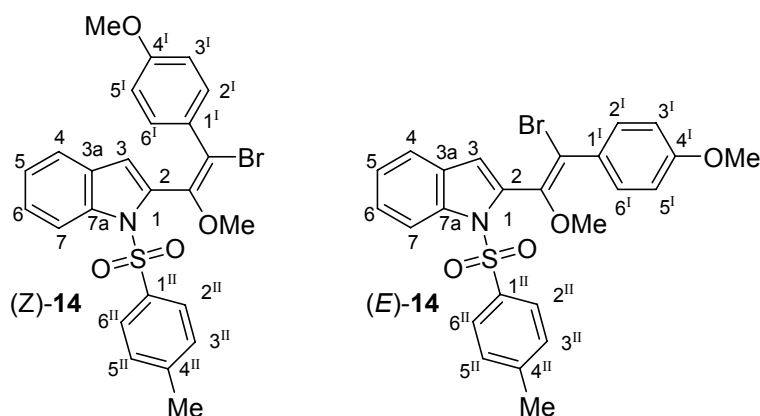

NBS (210.0 mg, 1.19 mmol) was added to a solution of (*Z*)-**13** (431.6 mg, 1.0 mmol) in dry THF (5 mL) cooled at -78 °C and the solution was allowed to reach room temperature for 1h. CH<sub>2</sub>Cl<sub>2</sub> (50 mL) was added and the solution was filtrated over an alumina plug and concentrated at reduced pressure to obtain a stereoisomeric mixture of (*Z*)-**14** and (*E*)-**14** (483.9 mg, in a 2.6:1 ratio determined by HPLC and <sup>1</sup>H-NMR). The above mixture (*Z*)-**14** and (*E*)-**14** (483.9 mg) was crystallized with acetonitrile (3 mL) to obtain (*Z*)-**14** pure (259.3 mg, 51% yield) as a white solid and a mixture of (*Z*)-**14** and (*E*)-**14** (180.3 mg, 35% yield, in a 1:1 ratio determined by HPLC) as a yellow pale foam. Purification of 30 mg of the stereoisomeric mixture of (*Z*)-**14** and (*E*)-**14** using semipreparative HPLC with a C18 column [7.8 × 100 mm, 5 μm, CH<sub>3</sub>CN/H<sub>2</sub>O 60:40 isocratic, flow of 3 ml/min] allowed to obtain 15.5 mg of (*Z*)-**14** as a white solid and 6 mg of (*E*)-**14** as a yellow oil.

(*Z*)-**14**: mp 160–161 °C (CH<sub>3</sub>CN / H<sub>2</sub>O); IR (KBr)  $\nu$  2933, 1605, 1508, 1372, 1239, 1175, 827, 748, 679 cm<sup>-1</sup>; <sup>1</sup>H NMR  $\delta$ : 2.38 (s, 3 H, CH<sub>3</sub> Ts), 3.14 (s, 3 H, OCH<sub>3</sub> enol), 3.71 (s, 3 H, OCH<sub>3</sub>), 6.41 (s, 1 H, H<sub>3</sub>), 6.67 (d,  $J$  = 8.8 Hz, 2 H, H<sub>3</sub><sup>I</sup> and 5<sup>I</sup>), 7.20 (td,  $J$  = 8.2 and 1.2 Hz, 1 H, H<sub>5</sub>), 7.24 (d,  $J$  = 8.2 Hz, 2 H, H<sub>3</sub><sup>II</sup> and 5<sup>II</sup>), 7.33 (d,  $J$  = 8.8 Hz, 2 H, H<sub>2</sub><sup>I</sup> and 6<sup>I</sup>), 7.35 (td, 1 H,  $J$  = 8.2 and 1.2 Hz, H<sub>6</sub>), 7.40 (dd,  $J$  = 8.2 and 1.2 Hz, 1 H, H<sub>4</sub>), 7.89 (d,  $J$  = 8.2 Hz, 2 H, H<sub>2</sub><sup>II</sup> and 6<sup>II</sup>), 8.12 (dd,  $J$  = 8.2 and 1.2 Hz, 1 H, H<sub>7</sub>); <sup>13</sup>C NMR  $\delta$ : 21.6 (q, CH<sub>3</sub> Ts), 55.1 (q, OCH<sub>3</sub>), 56.7 (q, OCH<sub>3</sub> enol), 111.5 (C, C-Ar), 113.4 (d, C<sub>3</sub><sup>I</sup> and 5<sup>I</sup>), 114.4 (d, C<sub>7</sub>), 115.1 (d, C<sub>3</sub>), 121.4 (d, C<sub>4</sub>), 123.3 (d, C<sub>5</sub>), 125.4 (d, C<sub>6</sub>), 127.4 (d, C<sub>2</sub><sup>II</sup> and 6<sup>II</sup>), 128.1 (s, C<sub>3a</sub>), 129.5 (d, C<sub>3</sub><sup>II</sup> and 5<sup>II</sup>), 130.3 (s, C<sub>1</sub><sup>I</sup>), 131.0 (d, C<sub>2</sub><sup>I</sup> and 6<sup>I</sup>) and (s, C<sub>2</sub>), 136.2 (s, C<sub>4</sub><sup>II</sup>), 136.6 (s, C<sub>7a</sub>), 144.1 (s, C-OMe), 144.8 (s, C<sub>1</sub><sup>II</sup>), 159.1 (s, C<sub>4</sub><sup>I</sup>). MS (ESI+),  $m/z$  (%): 514 (8) and 512 (8) ([M+H]<sup>+</sup>), 433 ([M-Br+H]<sup>+</sup>, 93), 401 ([M-Br-MeO]<sup>+</sup>, 25), 359 (36), 357 (18), 341 (21), 293 (10), 278 (100), 247 (22). HPLC-PDA analysis (CH<sub>3</sub>CN/H<sub>2</sub>O 60:40 till CH<sub>3</sub>CN/H<sub>2</sub>O 90:10 (15 min), then CH<sub>3</sub>CN 100% (1 min), flow of 1 ml/min) (retention time): 8.87 min. HRMS (CI) calcd for [C<sub>25</sub>H<sub>22</sub>BrNO<sub>4</sub>S+2H]<sup>+</sup>: 514.42. Found: 514.50.

(*E*)-**14**: IR (NaCl)  $\nu$  2931, 1604, 1507, 1374, 1252, 1175, 678, 578 cm<sup>-1</sup>; <sup>1</sup>H NMR  $\delta$ : 2.32 (s, 3 H, CH<sub>3</sub> Ts), 3.38 (s, 3 H, OCH<sub>3</sub> enol), 3.86 (s, 3 H, OCH<sub>3</sub>), 6.87 (s, 1 H, H<sub>3</sub>), 6.93 (d,  $J$  = 9.0 Hz, 2 H, H<sub>3</sub><sup>I</sup> and 5<sup>I</sup>), 7.18 (d,  $J$  = 8.4 Hz, 2 H, H<sub>3</sub><sup>II</sup> and 5<sup>II</sup>), 7.28 (td,  $J$  = 8.2 and 0.8 Hz, 1 H, H<sub>5</sub>), 7.40 (td, 1 H,  $J$  = 8.2 and 1.2 Hz, H<sub>6</sub>), 7.57 (dd,  $J$  = 8.2 and 1.2 Hz, 1 H, H<sub>4</sub>), 7.68 (d,  $J$  = 9.0 Hz, 2 H, H<sub>2</sub><sup>I</sup> and 6<sup>I</sup>), 7.89 (d,  $J$  = 8.4 Hz, 2 H, H<sub>2</sub><sup>II</sup> and 6<sup>II</sup>), 8.21 (dd,  $J$  = 8.2 and 0.8 Hz, 1 H, H<sub>7</sub>); <sup>13</sup>C NMR  $\delta$ : 21.6 (q, CH<sub>3</sub> Ts), 55.3 (q, OCH<sub>3</sub>), 57.8 (q, OCH<sub>3</sub> enol), 110.5 (s, C-Ar), 113.3 (d, C<sub>3</sub><sup>I</sup> and 5<sup>I</sup>), 114.9 (d, C<sub>7</sub>), 115.5 (d, C<sub>3</sub>), 121.5 (d, C<sub>4</sub>), 123.7 (d, C<sub>5</sub>), 125.6 (d, C<sub>6</sub>), 127.6 (d, C<sub>2</sub><sup>II</sup> and 6<sup>II</sup>), 128.8 (s, C<sub>3a</sub>), 129.6 (d, C<sub>3</sub><sup>II</sup> and 5<sup>II</sup>), 131.1 (d, C<sub>2</sub><sup>I</sup> and 6<sup>I</sup>), 132.8 and 136.5 (s, C<sub>7a</sub>\*) and (s, C<sub>2</sub>\*), 135.4 (s, C<sub>4</sub><sup>II</sup>), 144.7 (s, C-OMe), 144.9 (s, C<sub>1</sub><sup>II</sup>), 159.4 (s, C<sub>4</sub><sup>I</sup>). MS (EI),  $m/z$  (%): 514 (10) and 512 (10) ([M+H]<sup>+</sup>), 433 ([M-Br+H]<sup>+</sup>, 100), 401 ([M-Br-MeO]<sup>+</sup>, 20), 359 (29), 357 (42), 341 (19), 337 (21), 278 (89), 247 (24), 234 (25). HPLC-PDA analysis (CH<sub>3</sub>CN/H<sub>2</sub>O 60:40 till CH<sub>3</sub>CN/H<sub>2</sub>O 90:10 (15 min), then CH<sub>3</sub>CN 100% (1 min), flow of 1 ml/min) (retention time): 9.69 min. HRMS (ESI+) calcd for [C<sub>25</sub>H<sub>22</sub>BrNO<sub>4</sub>S+NH<sub>4</sub>]<sup>+</sup>: 529.0791. Found: 529.0775.

\*Interchangeable C

(*Z*)-2-[1-Methoxy-2-(4-methoxyphenyl)vinyl]-1*H*-indole, (*Z*)-**15**

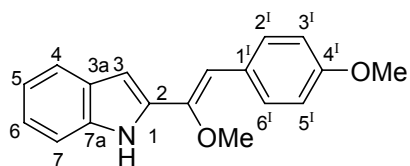

(*Z*)-**15**

A suspension of (*Z*)-**13** (756.4 mg, 1.74 mmol), Cs<sub>2</sub>CO<sub>3</sub> (1.89 g, 5.74 mmol) in a 2:1 mixture of THF and MeOH (87 mL) was stirred at 60 °C for 24 h. The reaction mixture was allowed to cool to room temperature. Water (70 mL) was added and the aqueous layer was extracted with AcOEt (70 mL). The organic layer was washed with water (40 mL) and brine (40 mL) and was dried (anhydrous Na<sub>2</sub>SO<sub>4</sub>). Elimination of solvent at reduced pressure gave pure (*Z*)-**15** (477.0 mg, 98% yield) as a pale yellow solid. An analytical sample was obtained by trituration from diethyl ether giving (*Z*)-**15** as a white solid, mp 157–159 °C (diethyl ether); IR (KBr)  $\nu$  3325, 3296,

1653, 1513, 1341, 1246, 1161  $\text{cm}^{-1}$ ;  $^1\text{H NMR}$   $\delta$ : 3.76 (s, 3 H,  $\text{OCH}_3$  enol), 3.85 (s, 3 H,  $\text{OCH}_3$ ), 6.28 (s, 1 H, CH-Ar), 6.73 (d,  $J = 1.2$  Hz, 1 H, H3), 6.92 (d,  $J = 8.8$  Hz, 2 H,  $\text{H}_3^1$  and  $5^1$ ), 7.12 (td, 1 H,  $J = 8.0$  and 0.8 Hz, H5), 7.20 (td,  $J = 8.0$  and 0.8 Hz, 1 H, H6), 7.37 (br d,  $J = 8.0$  Hz, 1 H, H7), 7.61 (br d,  $J = 8.0$  Hz, 1 H, H4), 7.66 (d,  $J = 8.8$  Hz, 2 H,  $\text{H}_2^1$  and  $6^1$ ), 8.31 (br s, 1 H, NH);  $^{13}\text{C NMR}$   $\delta$ : 55.3 (q,  $\text{OCH}_3$ ), 58.9 (q,  $\text{OCH}_3$  enol), 110.9 (d, C3), 110.8 (d, C7), 112.4 (d, CH-Ar), 114.0 (d,  $\text{C}_3^1$  and  $5^1$ ), 120.2 (d, C5), 120.6 (d, C4), 122.5 (d, C6), 127.8 (s,  $\text{C}_1^1$ ), 128.8 (C, C7a), 130.0 (d,  $\text{C}_2^1$  and  $6^1$ ), 134.8 (s, C2), 136.2 (s, C3a), 147.5 (s, C-OMe), 158.6 (C,  $\text{C}_4^1$ ). MS (ESI+),  $m/z$  (%): 280 ( $[\text{M}+\text{H}]^+$ , 5), 267 (18), 266 (100), 121 (24). HRMS (ESI+) calcd for  $[\text{C}_{18}\text{H}_{17}\text{NO}_2+\text{H}]^+$ : 280.1332. Found: 280.1339.

**(Z)-2-[2-Bromo-1-methoxy-2-(4-methoxyphenyl)vinyl]-1H-indole, (Z)-16**

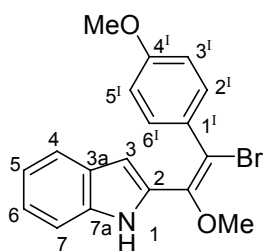

**(Z)-16**

A suspension of (Z)-14 (10.0 mg, 0.02 mmol),  $\text{Cs}_2\text{CO}_3$  (22.0 mg, 0.066 mmol) in a 2:1 mixture of THF and MeOH (1 mL) was stirred at 60 °C for 24 h. The reaction mixture was allowed to cool to room temperature. Water (10 mL) was added and the aqueous layer was extracted with AcOEt (10 mL). The organic layer was washed with water (5 mL) and brine (5 mL) and was dried (anhydrous  $\text{Na}_2\text{SO}_4$ ). Elimination of solvent at reduced pressure gave pure (Z)-

16 (0.07 mg, quantitative yield) as a yellow oil; IR (NaCl)  $\nu$  3364, 2924, 2853, 1601, 1506, 1452, 1294, 1242  $\text{cm}^{-1}$ ;  $^1\text{H NMR}$   $\delta$ : 3.78 (s, 3 H,  $\text{OCH}_3$  enol), 3.83 (s, 3 H,  $\text{OCH}_3$ ), 6.32 (d,  $J = 1.6$  Hz, 1 H, H3), 6.87 (d,  $J = 8.8$  Hz, 2 H,  $\text{H}_3^1$  and  $5^1$ ), 7.05 (td,  $J = 8.0$  and 1.2 Hz, 1 H, H5), 7.14 (td,  $J = 8.0$  and 1.2 Hz, 1 H, H6), 7.17 (m, 1 H, H7), 7.33 (d,  $J = 8.8$  Hz, 2 H,  $\text{H}_2^1$  and  $6^1$ ), 7.49 (dd,  $J = 8.0$  and 1.2 Hz, 1 H, H4), 7.74 (br s, 1 H, NH);  $^{13}\text{C NMR}$   $\delta$ : 55.3 (q,  $\text{OCH}_3$ ), 59.3 (q,  $\text{OCH}_3$  enol), 105.2 (d, C3), 110.0 (s, C-Ar), 110.9 (d, C7), 114.3 (d,  $\text{C}_3^1$  and  $5^1$ ), 120.2 (d, C5), 120.9 (d, C4), 123.0 (d, C6), 127.8 (s, C3a), 130.1 (s,  $\text{C}_1^1$ ), 130.3 (s, C2), 131.4 (d,  $\text{C}_2^1$  and  $6^1$ ), 135.8 (s, C7a), 146.1 (s, C-OMe), 159.9 (s,  $\text{C}_4^1$ ). MS (ESI+),  $m/z$  (%): 360 (98) i 358 (100) ( $[\text{M}+\text{H}]^+$ ), 326 (26), 282 (40), 240 (47), 130 (55). HRMS (ESI+) calcd for  $[\text{C}_{18}\text{H}_{16}\text{BrNO}_2+\text{H}]^+$ : 358.0437. Found: 358.0430.

**(Z)-3-Bromo-2-[1-methoxy-2-(4-methoxyphenyl)vinyl]-1H-indole, (Z)-17 and (Z)-3-bromo-2-[1-methoxy-2-(4-methoxyphenyl)vinyl]-N-tosyl-1H-indole, (Z)-18**

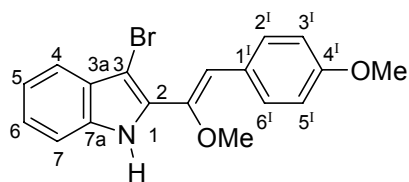

**(Z)-17**

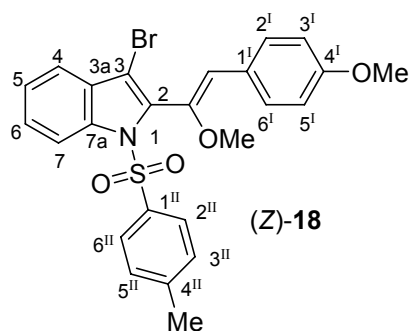

**(Z)-18**

NBS (350 mg, 1.99 mmol) and (Z)-**15** (550 mg, 1.97 mmol) were added to a suspension of MeONa, prepared from Na (50.0 mg, 2.17 mmol) and MeOH (15 mL) cooled at 0 °C. The reaction mixture was allowed to react to room temperature and was stirred for 2 h. The solvent was evaporated under reduced pressure, water (20 mL) was added and the aqueous layer was extracted with CH<sub>2</sub>Cl<sub>2</sub> (2 × 20 mL). The combined organic layers were dried over anhydrous Na<sub>2</sub>SO<sub>4</sub>, filtered, and concentrated in vacuum to give (Z)-**17** as an orange foam (720 mg). A solution of the above orange oil (720 mg) in dry THF (6 mL) was added, dropwise, to a stirred suspension cooled at 0 °C of NaH (130 mg, 3.15 mmol) in dry THF (2 mL). When hydrogen evolution ceased, TsCl (450 mg, 2.36 mmol) was added and the mixture was allowed to heat to room temperature and was stirred for 17 h. H<sub>2</sub>O (20 mL) was added and the mixture was stirred for more 10 minutes. The solvent was removed under reduced pressure, AcOEt (50 mL) was added and the organic phase was washed with saturated aqueous NaHCO<sub>3</sub> solution (3 × 20 mL), H<sub>2</sub>O (3 × 20 mL) and brine (2 × 20 mL). The organic phase was dried (anhydrous Na<sub>2</sub>SO<sub>4</sub>) and concentrated at reduced pressure to give an orange residue (1.05 g) which was submitted to flash silica gel column chromatography (hexane / AcOEt 97:3) to give pure (Z)-**18** (720 mg, 72% overall yield) as a brown pale foam.

(Z)-**18**: mp 152–154 °C (hexane / AcOEt); IR (KBr)  $\nu$  2932, 1605, 1551, 1378, 1297, 1175, 661, 607 cm<sup>-1</sup>; <sup>1</sup>H NMR  $\delta$ : 2.34 (s, 3 H, CH<sub>3</sub> Ts), 3.58 (s, 3 H, OCH<sub>3</sub> enol), 3.85 (s, 3 H, OCH<sub>3</sub>), 5.36 (s, 1 H, CH-Ar), 6.93 (d,  $J$  = 8.8 Hz, 2 H, H3<sup>I</sup> and 5<sup>I</sup>), 7.13 (d,  $J$  = 8.4 Hz, 2 H, H3<sup>II</sup> and 5<sup>II</sup>), 7.38 (td,  $J$  = 7.6 and 0.4 Hz, 1 H, H5), 7.48 (td, 1 H,  $J$  = 8.4 and 1.2 Hz, H6), 7.54 (br d,  $J$  = 7.6 Hz, 1 H, H4), 7.67 (d,  $J$  = 8.8 Hz, 2 H, H2<sup>I</sup> and 6<sup>I</sup>), 7.69 (d,  $J$  = 8.4 Hz, 2 H, H2<sup>II</sup> and 6<sup>II</sup>), 8.33 (br d,  $J$  = 8.4 Hz, 1 H, H7); <sup>13</sup>C NMR  $\delta$ : 21.6 (q, CH<sub>3</sub> Ts), 55.3 (q, OCH<sub>3</sub>), 56.6 (q, OCH<sub>3</sub> enol), 105.9 (s, C3), 113.8 (d, C3<sup>I</sup> and 5<sup>I</sup>), 115.4 (d, C7), 115.5 (d, CH-Ar), 120.5 (d, C4), 124.4 (d, C5), 126.8 (d, C6), 127.3 (d, C2<sup>II</sup> and 6<sup>II</sup>), 128.1 (s, C1<sup>I</sup>), 128.9 (s, C3a), 129.5 (d, C3<sup>II</sup> and 5<sup>II</sup>), 130.3 (d, C2<sup>I</sup> and 6<sup>I</sup>), 132.4 (s, C2), 135.3 (s, C4<sup>II</sup>), 135.9 (s, C7a), 142.6 (s, C-OMe), 145.2 (s, C1<sup>II</sup>), 158.5 (s, C4<sup>I</sup>). MS (ESI+),  $m/z$  (%): 531 (65) and 529 (61) ([M+NH<sub>4</sub>]<sup>+</sup>), 514 (48) and 512 (46) ([M+H]<sup>+</sup>). HRMS (ESI+) calcd for [C<sub>25</sub>H<sub>22</sub>BrNO<sub>4</sub>S+H]<sup>+</sup>: 512.0525. Found: 512.0528.

(Z)-**17**: <sup>1</sup>H NMR  $\delta$ : 3.69 (s, 3 H, OCH<sub>3</sub> enol), 3.85 (s, 3 H, OCH<sub>3</sub>), 6.67 (s, 1 H, CH-Ar), 6.93 (d,  $J$  = 8.8 Hz, 2 H, H3<sup>I</sup> and 5<sup>I</sup>), 7.20-7.28 (m, 2 H, H5 and H6), 7.35 (br d,  $J$  = 8.0 Hz, 1 H, H4\*), 7.60 (br d,  $J$  = 8.0 Hz, 1 H, H7\*), 7.70 (d,  $J$  = 8.8 Hz, 2 H, H2<sup>I</sup> and 6<sup>I</sup>), 8.51 (br s, 1 H, NH).

\* Interchangeable H

**(Z)-2-[1-Methoxy-2-[4-methoxyphenyl]vinyl]-3-[1-(4-methoxyphenethyl)-4-(4-methoxyphenyl)-1H-pyrrol-3-yl]-N-tosyl-1H-indole, (Z)-19**

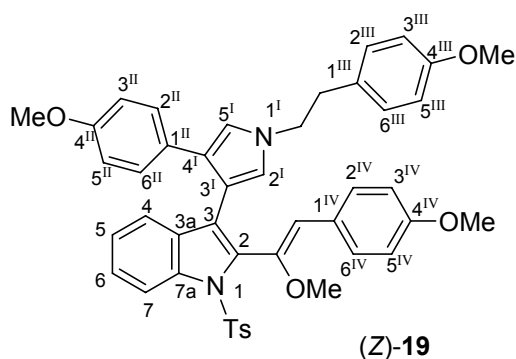

A solution of *n*-BuLi (2.5 M in hexane, 0.75 mL, 1.86 mmol) was added dropwise to a solution of **10** (403 mg, 0.93 mmol) in dry THF (5 mL) at -78 °C. The reaction mixture was stirred for 25 min at -78 °C and



then a solution of 2-methoxy-4,4,5,5-tetramethyl-1,3,2-dioxaborolane (0.95 mL, 5.58 mmol) in dry THF (20 mL) was added. The mixture was stirred at  $-78^{\circ}\text{C}$  for 1 h, allowed to warm to room temperature and then quenched with saturated aqueous  $\text{NH}_4\text{Cl}$  solution (20 mL). The aqueous solution was extracted with diethyl ether ( $3 \times 20$  mL). The combined organic phases were dried (anhydrous  $\text{Na}_2\text{SO}_4$ ) and concentrated at reduced pressure to give **2** as an orange oil (1.14 g).  $\text{Pd}(\text{PPh}_3)_4$  (72.0 mg, 0.062 mmol) was added to a stirred mixture of the above orange oil (1.14 g), (*Z*)-**18** (320 mg, 0.62 mmol), aqueous  $\text{Na}_2\text{CO}_3$  solution (2 M, 0.62 mL, 1.24 mmol) and DMF (16 mL) under an argon atmosphere and the mixture was heated at reflux temperature for 16 h. After cooling, the solvent was evaporated under reduced pressure and the aqueous layer was extracted with AcOEt ( $3 \times 60$  mL). The combined organic layers were dried over anhydrous  $\text{Na}_2\text{SO}_4$ , filtered, and concentrated at reduced pressure to give an orange oil (1.34 g) which was submitted to flash silica gel column chromatography (hexane / AcOEt 75:25) to give a brown solid which was purified by trituration in *n*-pentane to give pure (*Z*)-**19** (270 mg, 59% yield) as a brown pale foam, mp  $72\text{--}74^{\circ}\text{C}$  (*n*-pentane); IR (KBr)  $\nu$  2933, 2836, 1677, 1608, 1510, 1372, 1247, 1175, 1035  $\text{cm}^{-1}$ ;  $^1\text{H}$  NMR  $\delta$ : 2.38 (s, 3 H,  $\text{CH}_3$  Ts), 2.92 (t, 2 H,  $J = 6.8$  Hz,  $\text{CH}_2\text{-Ar}$ ), 3.49 (s, 3 H, OCH<sub>3</sub>), 3.72 (s, 3 H,  $\text{C}4^{\text{II}}\text{-OCH}_3$ ), 3.75 (s, 3 H,  $\text{C}4^{\text{III}}\text{-OCH}_3$ ), 3.79 (s, 3 H,  $\text{C}4^{\text{IV}}\text{-OCH}_3$ ), 4.00 (t, 2 H,  $J = 6.8$  Hz,  $\text{CH}_2\text{-N}$ ), 4.84 (s, 1 H, CH-Ar), 6.42 (d, 1 H,  $J = 2.4$  Hz,  $\text{H}2^{\text{I}}$ ), 6.49 (d,  $J = 8.8$  Hz, 2 H,  $\text{H}3^{\text{III}}$  and  $5^{\text{III}}$ ), 6.62 (d, 1 H,  $J = 2.4$  Hz,  $\text{H}5^{\text{I}}$ ), 6.65 (d, 2 H,  $J = 8.4$  Hz,  $\text{H}2^{\text{II}}$  and  $6^{\text{II}}$ ), 6.80 (d, 2 H,  $J = 8.8$  Hz,  $\text{H}2^{\text{III}}$  and  $6^{\text{III}}$ ), 6.82 (d, 2 H,  $J = 8.4$  Hz,  $\text{H}3^{\text{II}}$  and  $5^{\text{II}}$ ), 6.84 (d,  $J = 8.8$  Hz, 2 H,  $\text{H}3^{\text{IV}}$  and  $5^{\text{IV}}$ ), 7.09 (d,  $J = 8.4$  Hz, 2 H, H3 and 5 Ts), 7.18-7.24 (m, 2 H, H4 and H5), 7.37-7.40 (m, 3 H, H6 and  $\text{H}2^{\text{IV}}$  and  $6^{\text{IV}}$ ), 7.60 (d,  $J = 8.4$  Hz, 2 H, H2 and 6 Ts), 8.33 (br d,  $J = 8.4$  Hz, 1 H, H7);  $^{13}\text{C}$  NMR  $\delta$ : 21.5 (q,  $\text{CH}_3$  Ts), 37.3 (t,  $\text{CH}_2\text{-Ar}$ ), 51.7 (t,  $\text{CH}_2\text{-N}$ ), 55.16 (q, OCH<sub>3</sub>), 55.19 (q, OCH<sub>3</sub>), 55.20 (q, OCH<sub>3</sub>), 56.1 (q, OCH<sub>3</sub>), 111.5 (s,  $\text{C}3^{\text{I}}$ ), 113.4 (d,  $\text{C}3^{\text{II}}$  and  $5^{\text{II}}$ ), 113.7 (d,  $\text{C}3^{\text{III}}$  and  $5^{\text{III}}$ ), 113.75 (d, CH-Ar), 113.8 (d,  $\text{C}2^{\text{II}}$  and  $6^{\text{II}}$ ), 115.5 (d, C7), 118.5 (d,  $\text{C}5^{\text{I}}$ ), 121.1 (d,  $\text{C}2^{\text{I}}$ ), 121.4 (d, C5), 122.9 (s, C3a), 123.8 (d, C4), 125.0 (s,  $\text{C}1^{\text{II}}$ ), 125.5 (d, C6), 127.2 (d, C2 and 6 Ts), 127.8 (d,  $\text{C}2^{\text{III}}$  and  $6^{\text{III}}$ ), 128.8 (s, C3), 128.9 (s,  $\text{C}1^{\text{III}}$ ), 129.2 (d, C3 and 5 Ts), 129.6 (d,  $\text{C}3^{\text{IV}}$  and  $5^{\text{IV}}$ ), 130.0 (d,  $\text{C}2^{\text{IV}}$  and  $6^{\text{IV}}$ ), 130.2 (s,  $\text{C}4^{\text{I}}$ ), 132.0 (2s,  $\text{C}1^{\text{IV}}$  and C2), 135.8 (s, C4 Ts), 136.5 (s, C7a), 143.9 (s, C-OMe), 144.5 (s, C1 Ts), 157.3 (s,  $\text{C}4^{\text{III}}$ ), 157.9 (s,  $\text{C}4^{\text{IV}}$ ), 158.3 (s,  $\text{C}4^{\text{II}}$ ). MS (ESI+),  $m/z$  (%): 1499 ( $[\text{2M}+\text{Na}]^+$ , 29), 739 ( $[\text{M}+\text{H}]^+$ , 66), 325 (20), 324 (100), 141 (14), 125 (31). HRMS (ESI+) calcd for  $[\text{C}_{45}\text{H}_{42}\text{N}_2\text{O}_6\text{S}+\text{H}]^+$ : 739.2836. Found: 739.2833.

**(Z)-2-[1-Methoxy-2-(4-methoxyphenyl)-2-[1-(4-methoxyphenethyl)-4-(4-methoxyphenyl)-1H-pyrrol-3-yl]vinyl]-N-tosyl-1H-indole, (Z)-20**

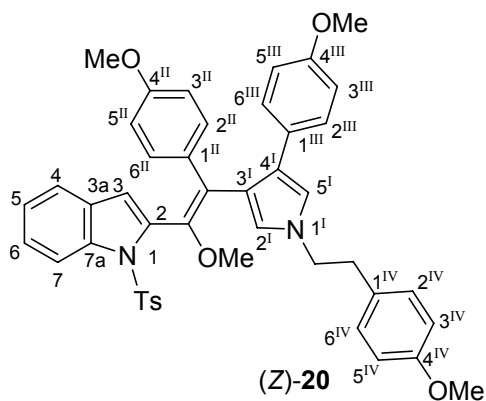

A solution of *n*-BuLi (2.5 M in hexane, 0.52 mL, 1.3 mmol) was added dropwise to a solution of **10** (280 mg, 0.65 mmol) in dry THF (3 mL) cooled at  $-78^{\circ}\text{C}$ . The reaction mixture was stirred for 25 min at  $-78^{\circ}\text{C}$  and then a solution of 2-methoxy-4,4,5,5-tetramethyl-1,3,2-dioxaborolane (0.7 mL, 3.9 mmol) in dry THF (13 mL)

was added. The mixture was stirred at  $-78\text{ }^{\circ}\text{C}$  for 1 h, allowed to warm to room temperature and then quenched with saturated aqueous  $\text{NH}_4\text{Cl}$  solution (10 mL). The aqueous solution was extracted with diethyl ether ( $3 \times 20\text{ mL}$ ). The combined organic phases were dried (anhydrous  $\text{Na}_2\text{SO}_4$ ) and concentrated at reduced pressure to give **2** as an orange oil (750 mg).  $\text{Pd}(\text{PPh}_3)_4$  (50 mg, 0.043 mmol) was added to a stirred mixture of the above orange oil (750 mg), (*Z*)-**14** (0.22 mL, 0.43 mmol), aqueous  $\text{Na}_2\text{CO}_3$  solution (2 M, 0.4 mL, 0.87 mmol) and DMF (11 mL) under an argon atmosphere and the mixture was heated at reflux temperature for 16 h. After cooling, the solvent was evaporated under reduced pressure and the aqueous layer was extracted with AcOEt ( $3 \times 20\text{ mL}$ ). The combined organic layers were dried over anhydrous  $\text{Na}_2\text{SO}_4$ , filtered, and concentrated at reduced pressure to give an orange oil (850 mg) which was submitted to flash silica gel column chromatography (hexane / AcOEt 80:20) to give a brown solid which was purified by trituration in *n*-pentane to give pure (*Z*)-**20** (210 mg, 67% yield) as a brown pale solid, mp  $64\text{--}66\text{ }^{\circ}\text{C}$  (*n*-pentane); IR (KBr)  $\nu$  2933, 1511, 1369, 1246, 1175, 749, 681  $\text{cm}^{-1}$ ;  $^1\text{H}$  NMR  $\delta$ : 2.33 (s, 3 H,  $\text{CH}_3$  Ts), 2.51 (s, 3 H,  $\text{OCH}_3$ ), 3.02 (t, 2 H,  $J = 7.2\text{ Hz}$ ,  $\text{CH}_2\text{-Ar}$ ), 3.65 (s, 3 H,  $\text{C}4^{\text{II}}\text{-OCH}_3$ ), 3.74 (s, 3 H,  $\text{C}4^{\text{III}}\text{-OCH}_3$ ), 3.77 (s, 3 H,  $\text{C}4^{\text{IV}}\text{-OCH}_3$ ), 4.04 (t, 2 H,  $J = 7.2\text{ Hz}$ ,  $\text{CH}_2\text{-N}$ ), 6.30 (s, 1 H, H3), 6.47 (d, 1 H,  $J = 2.4\text{ Hz}$ ,  $\text{H}2^{\text{I}}$ ), 6.54 (d, 2 H,  $J = 9.2\text{ Hz}$ ,  $\text{H}3^{\text{II}}$  and  $5^{\text{II}}$ ), 6.71 (d, 1 H,  $J = 2.4\text{ Hz}$ ,  $\text{H}5^{\text{I}}$ ), 6.80 (d, 2 H,  $J = 8.8\text{ Hz}$ ,  $\text{H}3^{\text{III}}$  and  $5^{\text{III}}$ ), 6.81 (d, 2 H,  $J = 8.4\text{ Hz}$ ,  $\text{H}3^{\text{IV}}$  and  $5^{\text{IV}}$ ), 7.02 (d, 2 H,  $J = 8.4\text{ Hz}$ ,  $\text{H}2^{\text{IV}}$  and  $6^{\text{IV}}$ ), 7.13-7.18 (m, 5 H, H5, H3 and 5 Ts and  $\text{H}2^{\text{II}}$  and  $6^{\text{II}}$ ), 7.29 (td, 1 H,  $J = 8.8$  and  $1.2\text{ Hz}$ , H6), 7.36 (br d, 1 H,  $J = 7.6\text{ Hz}$ , H4), 7.45 (d, 2 H,  $J = 8.8\text{ Hz}$ ,  $\text{H}2^{\text{III}}$  and  $6^{\text{III}}$ ), 7.93 (d, 2 H,  $J = 8.4\text{ Hz}$ , H2 and 6 Ts), 8.10 (br d, 1 H,  $J = 8.8\text{ Hz}$ , H7);  $^{13}\text{C}$  NMR  $\delta$ : 21.5 (q,  $\text{CH}_3$  Ts), 37.2 (t,  $\text{CH}_2\text{-Ar}$ ), 51.6 (t,  $\text{CH}_2\text{-N}$ ), 54.9 (q,  $\text{C}4^{\text{II}}\text{-OCH}_3$ ), 55.2 (2q,  $\text{C}4^{\text{III}}\text{-OCH}_3$  and  $\text{C}4^{\text{IV}}\text{-OCH}_3$ ), 56.6 (q,  $\text{OCH}_3$ ), 112.8 (d,  $\text{C}3^{\text{II}}$  and  $5^{\text{II}}$ ), 113.4 (2d, C3 and  $\text{C}3^{\text{III}}$  and  $5^{\text{III}}$ ), 113.9 (d,  $\text{C}3^{\text{IV}}$  and  $5^{\text{IV}}$ ), 114.3 (d, C7), 118.0 (d,  $\text{C}5^{\text{I}}$ ), 120.6 (s,  $\text{C}3^{\text{I}}$ ), 121.2 (d, C4), 121.7 (d,  $\text{C}2^{\text{I}}$ ), 122.1 (s, C-Ar), 122.9 (d, C5), 124.3 (s,  $\text{C}4^{\text{I}}$ ), 124.6 (d, C6), 127.4 (d, C2 and 6 Ts), 128.3 (d,  $\text{C}2^{\text{III}}$  and  $6^{\text{III}}$ ), 128.7 (s, C3a), 129.4 (d, C3 and 5 Ts), 129.7 (d,  $\text{C}2^{\text{IV}}$  and  $6^{\text{IV}}$ ), 130.4 (2s,  $\text{C}1^{\text{III}}$  and  $\text{C}1^{\text{IV}}$ ), 130.6 (d,  $\text{C}2^{\text{II}}$  and  $6^{\text{II}}$ ), 134.3 (s,  $\text{C}1^{\text{II}}$ ), 135.6 (s, C2), 136.5 (s, C7a), 136.7 (s, C4 Ts), 142.4 (s, C-OMe), 144.4 (s, C1 Ts), 157.6 (s,  $\text{C}4^{\text{III}}$ ), 157.7 (s,  $\text{C}4^{\text{II}}$ ), 158.3 (s,  $\text{C}4^{\text{IV}}$ ). MS (ESI+),  $m/z$  (%): 1499 ( $[\text{2M}+\text{Na}]^+$ , 10), 1495 ( $[\text{2M}+\text{NH}_4]^+$ , 10), 761 ( $[\text{M}+\text{Na}]^+$ , 13), 740 (25), 739 ( $[\text{M}+\text{H}]^+$ , 54), 217 (12), 203 (12), 141 (18), 108 (14), 106 (100). HRMS (ESI+) calcd for  $[\text{C}_{45}\text{H}_{42}\text{N}_2\text{O}_6\text{S}+\text{H}]^+$ : 739.2836. Found: 739.2835.

### 5-Methoxy-3-(4-methoxyphenethyl)-1,4-bis(4-methoxyphenyl)-3,6-dihydropyrrolo[2,3-*c*]carbazole,

**1**

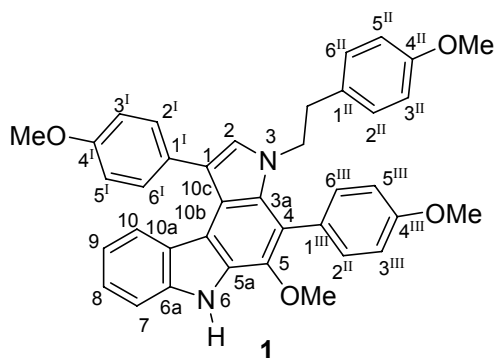

A solution of (*Z*)-**19** (50.1 mg, 0.068 mmol) and nitrobenzene (105  $\mu\text{L}$ ) in MeCN (6 mL) was introduced in a water-cooled photoreactor and purged with argon for 30 min. After this time, Pd/C (10%, 36 mg, 0.034 mmol) was added and the resulting suspension was irradiated with a medium pressure Hg-lamp (125 W) (cooled by a

stream of cold water) for 4 h. The suspension was filtered through a Celite® pad, which was carefully rinsed with EtOH / toluene (1:1, 20 mL). The organic solution was evaporated and the residue was submitted to flash silica gel column chromatography (hexane / AcOEt 92:8) to give **1** (15 mg) as a yellow solid. The solid was purified by trituration in MeCN to give pure **1** (10 mg, 25% yield) as a white solid, mp 249–250 °C (MeCN); IR (KBr)  $\nu$  3441, 2922, 2850, 1608, 1512, 1460, 1244, 1172, 1029  $\text{cm}^{-1}$ ;  $^1\text{H}$  NMR  $\delta$ : 2.63 (m, 2 H,  $\text{CH}_2\text{-Ar}$ ), 3.64 (s, 3 H,  $\text{C}5\text{-OCH}_3$ ), 3.75 (s, 3 H,  $\text{C}4^{\text{II}}\text{-OCH}_3$ ), 3.85 (m, 2 H,  $\text{CH}_2\text{-N}$ ), 3.93 (2s, 6 H,  $\text{C}4^{\text{I}}\text{-OCH}_3$  and  $\text{C}4^{\text{III}}\text{-OCH}_3$ ), 6.62 (d, 2 H,  $J = 8.8$  Hz,  $\text{H}2^{\text{II}}$  and  $6^{\text{II}}$ ), 6.67 (br d, 1 H,  $J = 7.6$ , H7), 6.70 (d, 2 H,  $J = 8.8$  Hz,  $\text{H}3^{\text{II}}$  and  $5^{\text{II}}$ ), 6.85 (td, 1 H,  $J = 7.6$  and  $0.8$  Hz, H8), 6.91 (s, 1 H, H2), 7.02 (d, 2 H,  $J = 8.8$  Hz,  $\text{H}3^{\text{I}}$  and  $5^{\text{I}}$ ), 7.08 (d, 2 H,  $J = 8.8$  Hz,  $\text{H}3^{\text{III}}$  and  $5^{\text{III}}$ ), 7.26 (br b, 1 H, H9), 7.45 (br d, 1 H,  $J = 7.6$  Hz, H10), 7.46 (d, 2 H,  $J = 8.8$  Hz,  $\text{H}2^{\text{I}}$  and  $6^{\text{I}}$ ), 7.55 (d, 2 H,  $J = 8.8$  Hz,  $\text{H}2^{\text{III}}$  and  $6^{\text{III}}$ ), 8.31 (br s, 1 H, NH);  $^{13}\text{C}$  NMR  $\delta$ : 37.0 (t,  $\text{CH}_2\text{-Ar}$ ), 50.2 (t,  $\text{CH}_2\text{-N}$ ), 55.2 (q,  $\text{C}4^{\text{II}}\text{-OCH}_3$ ), 55.4 and 55.5 (2q,  $\text{C}4^{\text{I}}\text{-OCH}_3$  and  $\text{C}4^{\text{III}}\text{-OCH}_3$ ), 61.3 (q,  $\text{C}5\text{-OCH}_3$ ), 110.2 (d, C10), 113.4 (d,  $\text{C}3^{\text{I}}$  and  $5^{\text{I}}$ ), 113.6 and 113.7 (2d,  $\text{C}3^{\text{II}}$  and  $5^{\text{II}}$  and  $\text{C}3^{\text{III}}$  and  $5^{\text{III}}$ ), 114.8 (s), 117.0 (s), 117.9 (s), 118.6 (d, C8), 119.4 (s), 123.8 (s), 124.0 (d, C9), 124.7 (d, C7), 127.6 (s,  $\text{C}1^{\text{III}}$ ), 128.9 (d, C2), 129.2 (s), 129.6 (d,  $\text{C}2^{\text{II}}$  and  $6^{\text{II}}$ ), 130.1 (s), 130.4 (s,  $\text{C}1^{\text{II}}$ ), 132.0 (d,  $\text{C}2^{\text{I}}$  and  $6^{\text{I}}$ ), 132.2 (d,  $\text{C}2^{\text{III}}$  and  $6^{\text{III}}$ ), 132.9 (s), 139.0 (s), 140.1 (s, C5), 158.1 (s,  $\text{C}4^{\text{II}}$ ), 158.8 (s,  $\text{C}4^{\text{I}}$ ), 159.3 (s,  $\text{C}4^{\text{III}}$ ). MS (ESI+),  $m/z$  (%): 583 ( $[\text{M}+\text{H}]^+$ , 94), 582 ( $\text{M}^+$ , 34), 326 (100), 311 (40), 304 (61), 301 (77), 242 (30), 191 (47), 135 (46), 130 (98). HRMS (ESI+) calcd for  $[\text{C}_{38}\text{H}_{34}\text{N}_2\text{O}_4+\text{H}]^+$ : 583.2591. Found: 583.2600.

**2,6-Dimethoxy-5-[1-(4-methoxyphenethyl)-4-(4-methoxyphenyl)-1H-pyrrol-3-yl]-7H-benzo[c]carbazole, 21**

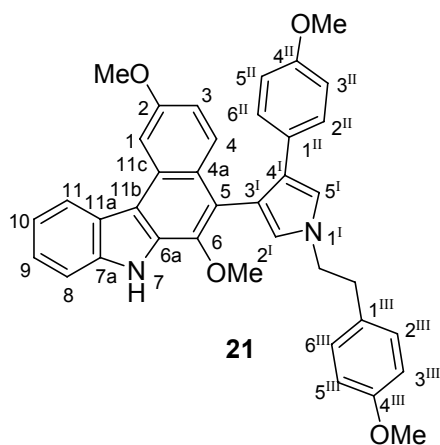

A solution of (*Z*)-**20** (56.1 mg, 0.076 mmol) and nitrobenzene (120  $\mu\text{L}$ ) in MeCN (6 mL) was introduced in a water-cooled photoreactor and was purged with argon for 30 min. After this time, Pd/C (10%, 43 mg, 0.04 mmol) was added and the resulting suspension was irradiated with a medium pressure Hg-lamp (125 W) (cooled by a stream of cold water) for 3 h. The suspension was filtered through a Celite® pad, which was carefully rinsed with EtOH / toluene (1:1, 20 mL). The organic solution was evaporated and the residue was submitted to flash silica gel column chromatography (hexane / AcOEt 86:14) to give **21** (7.7 mg, 17% yield) as an orange waxy; IR (NaCl)  $\nu$  3347, 2931, 1616, 1512, 1370, 1246, 1178, 1034, 826  $\text{cm}^{-1}$ ;  $^1\text{H}$  NMR  $\delta$ : 3.11 (t, 2 H,  $J = 7.2$  Hz,  $\text{CH}_2\text{-Ar}$ ), 3.61 and 3.62 (2s, 6 H,  $\text{C}4^{\text{II}}\text{-OCH}_3$  and  $\text{C}6\text{-OCH}_3$ ), 3.79 (s, 3 H,  $\text{C}4^{\text{III}}\text{-OCH}_3$ ), 4.06 (s, 3 H,  $\text{C}2\text{-OCH}_3$ ), 4.13–4.26 (m, 2 H,  $\text{CH}_2\text{-N}$ ), 6.54 (d, 2 H,  $J = 9.2$  Hz,  $\text{H}3^{\text{II}}$  and  $5^{\text{II}}$ ), 6.60 (d, 1 H,  $J = 2.6$  Hz,  $\text{H}2^{\text{I}}$ ), 6.85 (d, 2 H,  $J = 8.4$  Hz,  $\text{H}3^{\text{III}}$  and  $5^{\text{III}}$ ), 6.96 (d, 1 H,  $J = 2.6$  Hz,  $\text{H}5^{\text{I}}$ ), 6.99 (dd, 1 H,  $J = 9.2$  and  $2.8$  Hz, H3), 7.01 (d, 2 H,  $J = 9.2$  Hz,  $\text{H}2^{\text{II}}$  and  $6^{\text{II}}$ ), 7.09 (d, 2 H,  $J = 8.4$  Hz,  $\text{H}2^{\text{III}}$  and  $6^{\text{III}}$ ), 7.38 (td, 1 H,  $J = 8.0$  and  $0.8$  Hz, H10), 7.44 (td, 1 H,  $J = 8.0$  and  $0.8$  Hz, H9), 7.58 (br d, 1 H,  $J = 8.0$  Hz, H8), 7.80 (d, 1 H,  $J = 9.2$  Hz, H4), 8.06 (d, 1 H,  $J = 2.8$  Hz, H1), 8.48 (br d, 1 H,  $J = 8.0$

Hz, H11), 8.61 (br s, 1 H, NH);  $^{13}\text{C}$  NMR  $\delta$ : 37.4 (t,  $\text{CH}_2\text{-Ar}$ ), 51.6 (t,  $\text{CH}_2\text{-N}$ ), 55.0 (q,  $\text{OCH}_3$ ), 55.2 (q,  $\text{C4}^{\text{III}}\text{-OCH}_3$ ), 55.4 (q,  $\text{C2-OCH}_3$ ), 60.3 (q,  $\text{OCH}_3$ ), 103.4 (d, C1), 111.3 (d, C8), 113.6 (d,  $\text{C3}^{\text{II}}$  and  $5^{\text{II}}$ ), 113.8 (d, C3), 114.0 (d,  $\text{C3}^{\text{III}}$  and  $5^{\text{III}}$ ), 115.2 (s,  $\text{C3}^{\text{I}}$ ), 115.5 (s, C11b), 118.0 (d,  $\text{C5}^{\text{I}}$ ), 120.1 (d, C10), 121.5 (d, C11), 122.0 (s,  $\text{C5}^*$ ), 122.5 (d,  $\text{C2}^{\text{I}}$ ), 124.1 (d, C9), 124.6 and 124.7 (2s,  $\text{C4}^{\text{I}}$  and C11a), 125.8 (s, C11c), 127.1 (d,  $\text{C2}^{\text{II}}$  and  $6^{\text{II}}$ ), 128.3 (s,  $\text{C4a}^*$ ), 128.8 (s,  $\text{C1}^{\text{II}}$ ), 129.2 (d, C4), 129.7 (d,  $\text{C2}^{\text{III}}$  and  $6^{\text{III}}$ ), 130.3 (s,  $\text{C1}^{\text{III}}$ ), 132.9 (s, C6a), 138.2 (s, C7a), 142.3 (s, C6), 157.2 (s,  $\text{C4}^{\text{II}}$ ), 157.5 (s, C2), 158.4 (s,  $\text{C4}^{\text{III}}$ ). MS (ESI+),  $m/z$  (%): 583 ( $[\text{M}+\text{H}]^+$ , 54), 514 (36), 456 (30), 428 (42), 164 (81), 150 (100), 149 (42), 135 (39), 130 (59), 116 (42). HRMS (ESI+) calcd for  $[\text{C}_{38}\text{H}_{34}\text{N}_2\text{O}_4+\text{H}]^+$ : 583.2591. Found: 583.2595.

\* Interchangeable C

**2,6-Dimethoxy-5-[1-(4-methoxyphenethyl)-4-(4-methoxyphenyl)-1H-3-pyrrolyl]-7H-benzo[c]carbazole, 21 and 5-methoxy-1-(4-methoxyphenethyl)-3,4-bis(4-methoxyphenyl)-1,6-dihydropyrrolo[3,2-c]carbazole, 22**

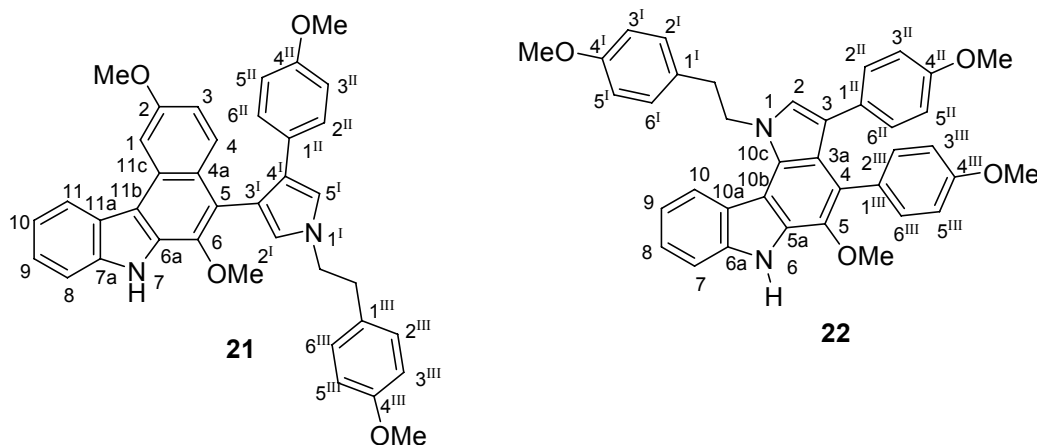

A solution of *n*-BuLi (2.5 M in hexane, 0.12 mL, 0.30 mmol) was added dropwise to a solution of **10** (64 mg, 0.148 mmol) in dry THF (1 mL) at  $-78^\circ\text{C}$ . The reaction mixture was stirred for 25 min at  $-78^\circ\text{C}$  and then a solution of 2-methoxy-4,4,5,5-tetramethyl-1,3,2-dioxaborolane (0.15 mL, 0.89 mmol) in dry THF (3 mL) was added. The mixture was stirred at  $-78^\circ\text{C}$  for 1 h, allowed to warm to room temperature and then quenched with saturated aqueous  $\text{NH}_4\text{Cl}$  solution (5 mL). The aqueous solution was extracted with diethyl ether ( $3 \times 5$  mL). The combined organic phases were dried (anhydrous  $\text{Na}_2\text{SO}_4$ ) and concentrated at reduced pressure to give **2** as a yellow oil (203 mg).  $\text{Pd}(\text{PPh}_3)_4$  (9.0 mg, 0.008 mmol) was added to a stirred mixture of the above yellow oil (203 mg), a stereoisomeric mixture of (*Z*)-**14** and (*E*)-**14** in a 2.6:1 ratio determined by HPLC and  $^1\text{H-NMR}$  (39 mg, 0.077 mmol), aqueous  $\text{Na}_2\text{CO}_3$  solution (2 M, 77  $\mu\text{L}$ , 0.154 mmol) and DMF (2 mL) under an argon atmosphere and the mixture was heated at reflux temperature for 16 h. After cooling, the solvent was evaporated under reduced pressure and the aqueous layer was extracted with AcOEt ( $3 \times 10$  mL). The combined organic layers were dried over anhydrous  $\text{Na}_2\text{SO}_4$ , filtered, and concentrated at reduced pressure to give a stereoisomeric mixture of (*Z*)-**20** and (*E*)-**20** as an orange oil (185 mg). A solution of the stereoisomeric mixture of (*Z*)-**20** and (*E*)-**20** (185 mg) and

nitrobenzene (115  $\mu$ L) in MeCN (6 mL) was introduced in a water-cooled photoreactor and was purged with argon for 30 min. After this time, Pd/C (10%, 43 mg, 0.04 mmol) was added and the resulting suspension was irradiated with a medium pressure Hg-lamp (125 W) (cooled by a stream of cold water) for 3 h. The suspension was filtered through a Celite® pad, which was carefully rinsed with EtOH / toluene (1:1, 20 mL). The organic solution was evaporated and the residue was submitted to flash silica gel column chromatography (hexane / AcOEt 90:10) to give **22** (2.1 mg, 4% yield) as a white solid and (hexane / AcOEt 86:14) to give **21** (6.2 mg, 13% yield) as an orange waxy. **22**: IR (KBr)  $\nu$  3341, 2925, 2853, 1610, 1560, 1246, 1176, 1034  $\text{cm}^{-1}$ ;  $^1\text{H}$  NMR  $\delta$ : 3.32 (m, 2 H,  $\text{CH}_2\text{Ar}$ ), 3.53 (s, 3 H, C5- $\text{OCH}_3$ ), 3.74, 3.75 and 3.81 (3s, 3  $\text{OCH}_3$ ), 4.97 (m, 2 H,  $\text{CH}_2\text{-N}$ ), 6.49 (d, 2 H,  $J = 8.8$  Hz, ArH), 6.57 (d, 2 H,  $J = 8.8$  Hz, ArH), 6.74 (d, 2 H,  $J = 8.8$  Hz, ArH), 6.82 (s, 1 H, H2), 6.86 (d, 2 H,  $J = 8.8$  Hz, ArH), 7.07 (d, 2 H,  $J = 8.4$  Hz, ArH), 7.10 (d, 2 H,  $J = 8.4$  Hz, ArH), 7.26 (t, 1 H,  $J = 8.0$  Hz, H8\*), 7.45 (t, 1 H,  $J = 8.0$  Hz, H9\*), 7.60 (br d, 1 H,  $J = 8.0$  Hz, H10), 8.37 (br d,  $J = 8.0$  Hz, 1 H, H7), 8.60 (br s, 1H, NH);  $^{13}\text{C}$  NMR  $\delta$ : 37.5 (t,  $\text{CH}_2\text{-Ar}$ ), 51.9 (t,  $\text{CH}_2\text{-N}$ ), 55.21 (q,  $\text{OCH}_3$ ), 55.25 (q,  $\text{OCH}_3$ ), 55.28 (q,  $\text{OCH}_3$ ), 60.8 (q, C5- $\text{OCH}_3$ ), 111.1 (d, C10), 112.5 (d), 112.6 (d), 114.0 (d and s), 119.4 (d and s), 120.1 (s), 122.2 (s), 122.6 (d, C7), 124.2 (d), 125.1 (s), 126.2 (d, C2), 127.3 (s), 127.7 (s), 128.1 (s) and 128.9 (s), 130.0 (d), 130.1 (s), 130.5 (d), 131.8 (d), 137.7 (s), 138.7 (s), 157.1 (s), 158.3 (s) and 158.4 (s). MS (ESI+),  $m/z$  (%): 583 ( $[\text{M}+\text{H}]^+$ , 53), 447 (32), 440 (67), 413 (21), 327 (25), 311 (26), 309 (24), 301 (44), 297 (21), 191 (22), 175 (36), 135 (100). HRMS (ESI+) calcd for  $[\text{C}_{38}\text{H}_{34}\text{N}_2\text{O}_4+\text{H}]^+$ : 583.2591. Found: 583.2588.

\*Interchangeable H
